# Supplementary material for: Prevalence and determinants of post-acute sequelae after SARS-CoV-2 infection (Long COVID) among adults in Mexico during 2022: a retrospective analysis of nationally representative data
Source: PubMed Central journal article supplement — Lancet Reg Health Am. 2024 Feb 3;30:100688. doi: 10.1016/j.lana.2024.100688 (PMC10847769; doi:10.1016/j.lana.2024.100688), 2024-02-03
Supplement: mmc1.pdf [file mmc1.pdf]

## **SUPPLEMENTARY MATERIAL**

### **Nationally representative prevalence and determinants of post-acute sequelae of SARS-CoV-2 infection (Long COVID) amongst adults in Mexico during 2022**

Omar Yaxmehen Bello-Chavolla, Carlos A. Fermín-Martínez, Daniel Ramírez-García, Arsenio Vargas-Vázquez, Luisa Fernández-Chirino, Martín Roberto Basile-Alvarez, Paulina Sánchez Castro, Alejandra Núñez-Luna, Neftali Eduardo Antonio-Villa

### **SUPPLEMENTARY METHODS**

#### **National Health and Nutrition Survey**

The Mexican National Health and Nutrition Survey (ENSANUT) comprises a series of population-based surveys that provide precise information on the health and nutritional status of Mexican population, as well as on the performance of our health care system. ENSANUT uses a two-stage probabilistic cluster stratified sampling based on households and individuals from each group of interest (adults [≥20 years], adolescents [10-19 years], school age [5-9 years], and preschool age [0-4 years]), and it is representative at a regional (North, Center, Mexico City, and South), and national level for rural and urban areas. ENSANUT has been conducted in 2006, 2012, 2016, 2018, 2020, 2021, and 2022. Sociodemographic and dwelling data is obtained from each household, and individual participants undergo a standardized health questionnaire that is applied in face-to-face interviews, followed by a physical exam including measurement of blood pressure and anthropometry (height in centimeters, weight in kilograms, and waist circumference in centimeters [not available for 2020]) by trained personnel. The physical exam was performed only in a subset of participants for the 2018 (40%) and 2021 (80 %) surveys. Additionally, a random subset of each cycle was selected for venous blood collection for biochemical evaluation of the following serum laboratory parameters: albumin, creatinine, uric acid, triglycerides, total cholesterol, LDL-cholesterol, HDL-cholesterol, glucose, insulin, glycated hemoglobin, and from 2020 onwards SARS-CoV-2 serology. All questionnaires and procedures were reviewed and approved by the Ethics, Investigation and Biosecurity Committee from the National Institute of Public Health for each year of survey (1–4).

## **REFERENCES**

1. Romero-Martínez M, Shamah-Levy T, Cuevas-Nasu L, Méndez Gómez-Humarán I, Gaona-Pineda EB, Gómez-Acosta LM, et al. Diseño metodológico de la Encuesta Nacional de Salud y Nutrición de Medio Camino 2016. *Salud Pública México*. 2017 May 31;59(3, may-jun):299.
2. Vista de Encuesta Nacional de Salud y Nutrición 2018-19: metodología y perspectivas [Internet]. [cited 2023 Apr 20]. Available from: <https://www.saludpublica.mx/index.php/spm/article/view/11095/11824>
3. Romero-Martínez M, Barrientos-Gutiérrez T, Cuevas-Nasu L, Bautista-Arredondo S, Colchero A, Gaona-Pineda EB, et al. Metodología de la Encuesta Nacional de Salud y Nutrición 2020 sobre Covid-19. *Salud Pública México*. 2021 May 3;63(3 May-Jun):444–51.
4. Martínez MR, Barrientos-Gutiérrez T, Cuevas-Nasu L, Bautista-Arredondo S, Colchero MA, Gaona-Pineda EB, et al. Metodología de la Encuesta Nacional de Salud y Nutrición 2021. *Salud Pública México*. 2021 Nov 5;63(6, Nov-Dic):813–8.

**SUPPLEMENTARY TABLES**

**SUPPLEMENTARY TABLE 1.** Sociodemographic and clinical characteristics of individuals with post-acute sequelae of SARS-CoV-2 symptoms (PASC) as identified by a PASC score  $\geq 12$  compared with PASC indeterminate individuals in ENSANUT 2022.

SUPPLEMENTARY MATERIAL - Nationally representative prevalence and determinants of post-acute sequelae of SARS-CoV-2 infection (Long COVID) amongst adults in Mexico during 2022

| Overall Sample                       |                                 |                                |                                          |                      |
|--------------------------------------|---------------------------------|--------------------------------|------------------------------------------|----------------------|
| Characteristic                       | Overall, N = 5,211 <sup>1</sup> | Without PASC-CDC,<br>N = 2,372 | With PASC-CDC, N =<br>2,893 <sup>1</sup> | p-value <sup>2</sup> |
| <b>Male sex (%)</b>                  | 2,322 (45%)                     | 1,148 (48%)                    | 1,174 (41%)                              | <0.001               |
| <b>Age (years)</b>                   | 43 (31, 55)                     | 41 (30, 54)                    | 45 (32, 56)                              | <0.001               |
| <b>Reinfection (%)</b>               | 638 (12%)                       | 258 (11%)                      | 380 (13%)                                | 0.006                |
| <b>Omicron variant (%)</b>           | 2,087 (40%)                     | 1,033 (44%)                    | 1,054 (37%)                              | <0.001               |
| <b>COVID-19 vaccine (%)</b>          | 4,830 (93%)                     | 2,219 (94%)                    | 2,611 (92%)                              | 0.029                |
| <b>Symptom duration</b>              |                                 |                                |                                          | <0.001               |
| No persistent symptoms               | 2,320 (45%)                     | 2,320 (98%)                    | 0 (0%)                                   |                      |
| <1 month                             | 1,363 (26%)                     | 45 (1.9%)                      | 1,318 (46%)                              |                      |
| 1-3 months                           | 478 (9.2%)                      | 3 (0.1%)                       | 475 (17%)                                |                      |
| 3-6 months                           | 124 (2.4%)                      | 0 (0%)                         | 124 (4.4%)                               |                      |
| >6 months                            | 126 (2.4%)                      | 0 (0%)                         | 126 (4.4%)                               |                      |
| Still persistent                     | 800 (28%)                       | 4 (0.2%)                       | 796 (28%)                                |                      |
| <b>Any symptom (%)</b>               | 2,839 (54%)                     | 2,394 (50%)                    | 445 (100%)                               | <0.001               |
| <b>Loss of smell/taste (%)</b>       | 692 (13%)                       | 0 (0%)                         | 692 (24%)                                | <0.001               |
| <b>Brain fog (%)</b>                 | 166 (3.2%)                      | 0 (0%)                         | 166 (5.8%)                               | <0.001               |
| <b>Gastrointestinal symptoms (%)</b> | 160 (3.1%)                      | 0 (0%)                         | 160 (5.6%)                               | <0.001               |
| <b>Chest pain (%)</b>                | 285 (5.5%)                      | 0 (0%)                         | 285 (10%)                                | <0.001               |
| <b>Breathlessness (%)</b>            | 358 (6.9%)                      | 0 (0%)                         | 358 (13%)                                | <0.001               |
| <b>Dyspnea (%)</b>                   | 513 (9.8%)                      | 0 (0%)                         | 513 (18%)                                | <0.001               |
| <b>Musculoskeletal pain (%)</b>      | 913 (18%)                       | 0 (0%)                         | 913 (32%)                                | <0.001               |

SUPPLEMENTARY MATERIAL - Nationally representative prevalence and determinants of post-acute sequelae of SARS-CoV-2 infection (Long COVID) amongst adults in Mexico during 2022

| Overall Sample                     |                                 |                                |                                          |                      |
|------------------------------------|---------------------------------|--------------------------------|------------------------------------------|----------------------|
| Characteristic                     | Overall, N = 5,211 <sup>1</sup> | Without PASC-CDC,<br>N = 2,372 | With PASC-CDC, N =<br>2,893 <sup>1</sup> | p-value <sup>2</sup> |
| <b>Dizziness (%)</b>               | 213 (4.1%)                      | 0 (0%)                         | 213 (7.5%)                               | <0.001               |
| <b>Headache (%)</b>                | 817 (16%)                       | 0 (0%)                         | 817 (29%)                                | <0.001               |
| <b>Weight loss (%)</b>             | 203 (3.9%)                      | 0 (0%)                         | 203 (7.2%)                               | <0.001               |
| <b>Loss of appetite (%)</b>        | 210 (4.0%)                      | 0 (0%)                         | 210 (7.4%)                               | <0.001               |
| <b>Kidney problems (%)</b>         | 55 (1.1%)                       | 0 (0%)                         | 55 (1.9%)                                | <0.001               |
| <b>Sleep disturbances (%)</b>      | 288 (5.5%)                      | 0 (0%)                         | 288 (10%)                                | <0.001               |
| <b>Fever (%)</b>                   | 670 (13%)                       | 0 (0%)                         | 670 (24%)                                | <0.001               |
| <b>Depression (%)</b>              | 187 (3.6%)                      | 0 (0%)                         | 187 (6.6%)                               | <0.001               |
| <b>Anxiety (%)</b>                 | 256 (4.9%)                      | 0 (0%)                         | 256 (9.0%)                               | <0.001               |
| <b>Fatigue (%)</b>                 | 1,250 (24%)                     | 0 (0%)                         | 1,250 (44%)                              | <0.001               |
| <b>Chronic cough (%)</b>           | 978 (19%)                       | 0 (0%)                         | 978 (34%)                                | <0.001               |
| <b>Post-exertional malaise (%)</b> | 541 (10%)                       | 5 (0.2%)                       | 536 (19%)                                | <0.001               |
| <b>PASC score</b>                  | 0.0 (0.0, 5.0)                  | 0.0 (0.0, 0.0)                 | 4.0 (1.0, 8.0)                           | <0.001               |
| <b>DISLI quartile</b>              |                                 |                                |                                          | <0.001               |
| Q1                                 | 1,707 (33%)                     | 840 (35%)                      | 867 (31%)                                |                      |
| Q2                                 | 1,630 (31%)                     | 751 (32%)                      | 879 (31%)                                |                      |
| Q3                                 | 965 (19%)                       | 406 (17%)                      | 559 (20%)                                |                      |
| Q4                                 | 909 (17%)                       | 375 (16%)                      | 534 (19%)                                |                      |
| <b>CES-D score</b>                 | 5.0 (3.0, 8.0)                  | 5.0 (3.0, 7.0)                 | 6.0 (3.0, 8.0)                           | <0.001               |
| <b>Diabetes (%)</b>                | 358 (14%)                       | 128 (12%)                      | 230 (16%)                                | 0.004                |

*SUPPLEMENTARY MATERIAL - Nationally representative prevalence and determinants of post-acute sequelae of SARS-CoV-2 infection (Long COVID) amongst adults in Mexico during 2022*

| Overall Sample                 |                                 |                             |                                       |                      |
|--------------------------------|---------------------------------|-----------------------------|---------------------------------------|----------------------|
| Characteristic                 | Overall, N = 5,211 <sup>1</sup> | Without PASC-CDC, N = 2,372 | With PASC-CDC, N = 2,893 <sup>1</sup> | p-value <sup>2</sup> |
| <b>Hypertension (%)</b>        | 505 (20%)                       | 178 (17%)                   | 327 (23%)                             | <0.001               |
| <b>Daily smoking (%)</b>       | 178 (7.1%)                      | 88 (8.2%)                   | 90 (6.3%)                             | 0.061                |
| <b>Vaccine type</b>            |                                 |                             |                                       | 0.049                |
| Unvaccinated                   | 381 (7.3%)                      | 153 (6.5%)                  | 228 (8.0%)                            |                      |
| mRNA                           | 1,607 (31%)                     | 749 (32%)                   | 858 (30%)                             |                      |
| Adenovirus vector              | 2,629 (50%)                     | 1,200 (51%)                 | 1,429 (50%)                           |                      |
| Inactivated virus              | 438 (8.4%)                      | 188 (7.9%)                  | 250 (8.8%)                            |                      |
| Other                          | 156 (3.0%)                      | 82 (3.5%)                   | 74 (2.6%)                             |                      |
| <b>Incapacitating symptoms</b> | 457 (8.8%)                      | 5 (0.2%)                    | 452 (16%)                             | <0.001               |

<sup>1</sup>n (%); Median (IQR)

<sup>2</sup>Pearson's Chi-squared test; Wilcoxon rank sum test; Fisher's exact test

**SUPPLEMENTARY TABLE 2.** Sociodemographic and clinical characteristics of individuals with post-acute sequelae of SARS-CoV-2 symptoms (PASC) with the CDC definition compared with individual with prior diagnosis of COVID-19 who did not report persistent symptoms in ENSANUT 2022.

SUPPLEMENTARY MATERIAL - Nationally representative prevalence and determinants of post-acute sequelae of SARS-CoV-2 infection (Long COVID) amongst adults in Mexico during 2022

| Overall Sample                       |                                 |                                            |                                     |                      |
|--------------------------------------|---------------------------------|--------------------------------------------|-------------------------------------|----------------------|
| Characteristic                       | Overall, N = 5,211 <sup>1</sup> | PACS indeterminate, N = 4,766 <sup>1</sup> | PACS positive, N = 445 <sup>1</sup> | p-value <sup>2</sup> |
| <b>Male sex (%)</b>                  | 2,322 (45%)                     | 2,124 (45%)                                | 198 (44%)                           | >0.9                 |
| <b>Age (years)</b>                   | 43 (31, 55)                     | 43 (31, 55)                                | 47 (34, 56)                         | 0.007                |
| <b>Reinfection (%)</b>               | 638 (12%)                       | 584 (12%)                                  | 54 (12%)                            | >0.9                 |
| <b>Omicron variant (%)</b>           | 2,087 (40%)                     | 1,954 (41%)                                | 133 (30%)                           | <0.001               |
| <b>COVID-19 vaccine (%)</b>          | 4,830 (93%)                     | 4,442 (93%)                                | 388 (87%)                           | <0.001               |
| <b>Symptom duration</b>              |                                 |                                            |                                     | <0.001               |
| No persistent symptoms               | 2,320 (45%)                     | 2,320 (49%)                                | 0 (0%)                              |                      |
| <1 month                             | 1,363 (26%)                     | 1,113 (23%)                                | 250 (56%)                           |                      |
| 1-3 months                           | 478 (9.2%)                      | 382 (8.0%)                                 | 96 (22%)                            |                      |
| 3-6 months                           | 124 (2.4%)                      | 107 (2.2%)                                 | 17 (3.8%)                           |                      |
| >6 months                            | 126 (2.4%)                      | 109 (2.3%)                                 | 17 (3.8%)                           |                      |
| Still persistent                     | 800 (28%)                       | 735 (30%)                                  | 65 (15%)                            |                      |
| <b>Any symptom (%)</b>               | 2,839 (54%)                     | 2,394 (50%)                                | 445 (100%)                          | <0.001               |
| <b>Loss of smell/taste (%)</b>       | 692 (13%)                       | 336 (7.0%)                                 | 356 (80%)                           | <0.001               |
| <b>Brain fog (%)</b>                 | 166 (3.2%)                      | 68 (1.4%)                                  | 98 (22%)                            | <0.001               |
| <b>Gastrointestinal symptoms (%)</b> | 160 (3.1%)                      | 77 (1.6%)                                  | 83 (19%)                            | <0.001               |
| <b>Chest pain (%)</b>                | 285 (5.5%)                      | 146 (3.1%)                                 | 139 (31%)                           | <0.001               |
| <b>Breathlessness (%)</b>            | 358 (6.9%)                      | 221 (4.6%)                                 | 137 (31%)                           | <0.001               |
| <b>Dyspnea (%)</b>                   | 513 (9.8%)                      | 349 (7.3%)                                 | 164 (37%)                           | <0.001               |
| <b>Musculoskeletal pain (%)</b>      | 913 (18%)                       | 645 (14%)                                  | 268 (60%)                           | <0.001               |

SUPPLEMENTARY MATERIAL - Nationally representative prevalence and determinants of post-acute sequelae of SARS-CoV-2 infection (Long COVID) amongst adults in Mexico during 2022

| Overall Sample                     |                                 |                                            |                                     |                      |
|------------------------------------|---------------------------------|--------------------------------------------|-------------------------------------|----------------------|
| Characteristic                     | Overall, N = 5,211 <sup>1</sup> | PACS indeterminate, N = 4,766 <sup>1</sup> | PACS positive, N = 445 <sup>1</sup> | p-value <sup>2</sup> |
| <b>Dizziness (%)</b>               | 213 (4.1%)                      | 108 (2.3%)                                 | 105 (24%)                           | <0.001               |
| <b>Headache (%)</b>                | 817 (16%)                       | 586 (12%)                                  | 231 (52%)                           | <0.001               |
| <b>Weight loss (%)</b>             | 203 (3.9%)                      | 104 (2.2%)                                 | 99 (22%)                            | <0.001               |
| <b>Loss of appetite (%)</b>        | 210 (4.0%)                      | 106 (2.2%)                                 | 104 (23%)                           | <0.001               |
| <b>Kidney problems (%)</b>         | 55 (1.1%)                       | 22 (0.5%)                                  | 33 (7.4%)                           | <0.001               |
| <b>Sleep disturbances (%)</b>      | 288 (5.5%)                      | 166 (3.5%)                                 | 122 (27%)                           | <0.001               |
| <b>Fever (%)</b>                   | 670 (13%)                       | 446 (9.4%)                                 | 224 (50%)                           | <0.001               |
| <b>Depression (%)</b>              | 187 (3.6%)                      | 107 (2.2%)                                 | 80 (18%)                            | <0.001               |
| <b>Anxiety (%)</b>                 | 256 (4.9%)                      | 153 (3.2%)                                 | 103 (23%)                           | <0.001               |
| <b>Fatigue (%)</b>                 | 1,250 (24%)                     | 952 (20%)                                  | 298 (67%)                           | <0.001               |
| <b>Chronic cough (%)</b>           | 978 (19%)                       | 645 (14%)                                  | 333 (75%)                           | <0.001               |
| <b>Post-exertional malaise (%)</b> | 541 (10%)                       | 268 (5.6%)                                 | 273 (61%)                           | <0.001               |
| <b>PASC score</b>                  | 0.0 (0.0, 5.0)                  | 0.0 (0.0, 4.0)                             | 15.0 (13.0, 19.0)                   | <0.001               |
| <b>DISLI quartile</b>              |                                 |                                            |                                     | 0.003                |
| Q1                                 | 1,707 (33%)                     | 1,594 (33%)                                | 113 (25%)                           |                      |
| Q2                                 | 1,630 (31%)                     | 1,465 (31%)                                | 165 (37%)                           |                      |
| Q3                                 | 965 (19%)                       | 882 (19%)                                  | 83 (19%)                            |                      |
| Q4                                 | 909 (17%)                       | 825 (17%)                                  | 84 (19%)                            |                      |
| <b>CES-D score</b>                 | 5.0 (3.0, 8.0)                  | 5.0 (3.0, 8.0)                             | 6.0 (3.0, 9.0)                      | 0.075                |
| <b>Diabetes (%)</b>                | 358 (14%)                       | 311 (14%)                                  | 47 (21%)                            | 0.002                |



| Overall Sample                 |                                 |                                            |                                     |                      |
|--------------------------------|---------------------------------|--------------------------------------------|-------------------------------------|----------------------|
| Characteristic                 | Overall, N = 5,211 <sup>1</sup> | PACS indeterminate, N = 4,766 <sup>1</sup> | PACS positive, N = 445 <sup>1</sup> | p-value <sup>2</sup> |
| <b>Hypertension (%)</b>        | 505 (20%)                       | 447 (20%)                                  | 58 (26%)                            | 0.018                |
| <b>Daily smoking (%)</b>       | 178 (7.1%)                      | 164 (7.2%)                                 | 14 (6.3%)                           | 0.6                  |
| <b>Vaccine type</b>            |                                 |                                            |                                     | <0.001               |
| Unvaccinated                   | 381 (7.3%)                      | 324 (6.8%)                                 | 57 (13%)                            |                      |
| mRNA                           | 1,607 (31%)                     | 1,476 (31%)                                | 131 (29%)                           |                      |
| Adenovirus vector              | 2,629 (50%)                     | 2,422 (51%)                                | 207 (47%)                           |                      |
| Inactivated virus              | 438 (8.4%)                      | 397 (8.3%)                                 | 41 (9.2%)                           |                      |
| Other                          | 156 (3.0%)                      | 147 (3.1%)                                 | 9 (2.0%)                            |                      |
| <b>Incapacitating symptoms</b> | 457 (8.8%)                      | 245 (5.1%)                                 | 212 (48%)                           | <0.001               |

<sup>1</sup>n (%); Median (IQR)

<sup>2</sup>Pearson's Chi-squared test; Wilcoxon rank sum test; Fisher's exact test

PASC indeterminate: An individual with PASC score <12

**SUPPLEMENTARY TABLE 3.** Sociodemographic and clinical characteristics of individuals with post-acute sequelae of SARS-CoV-2 symptoms (PASC) according to clustering in four categories using hierarchical agglomerative clustering in ENSANUT 2022.

SUPPLEMENTARY MATERIAL - Nationally representative prevalence and determinants of post-acute sequelae of SARS-CoV-2 infection (Long COVID) amongst adults in Mexico during 2022

| Overall Sample                       |                                 |                                 |                                 |                                 |                                |                      |
|--------------------------------------|---------------------------------|---------------------------------|---------------------------------|---------------------------------|--------------------------------|----------------------|
| Characteristic                       | Overall, N = 1,050 <sup>1</sup> | Cluster 1, N = 286 <sup>1</sup> | Cluster 2, N = 563 <sup>1</sup> | Cluster 3, N = 111 <sup>1</sup> | Cluster 4, N = 90 <sup>1</sup> | p-value <sup>2</sup> |
| <b>Male sex (%)</b>                  | 388 (37%)                       | 120 (42%)                       | 192 (34%)                       | 36 (32%)                        | 40 (44%)                       | 0.042                |
| <b>Age (years)</b>                   | 47 (35, 57)                     | 50 (36, 58)                     | 48 (36, 57)                     | 43 (29, 54)                     | 47 (38, 59)                    | 0.005                |
| <b>Reinfection (%)</b>               | 173 (16%)                       | 50 (17%)                        | 91 (16%)                        | 11 (9.9%)                       | 21 (23%)                       | 0.078                |
| <b>Omicron variant (%)</b>           | 371 (35%)                       | 109 (38%)                       | 214 (38%)                       | 15 (14%)                        | 33 (37%)                       | <0.001               |
| <b>COVID-19 vaccine (%)</b>          | 987 (94%)                       | 265 (93%)                       | 535 (95%)                       | 106 (95%)                       | 81 (90%)                       | 0.2                  |
| <b>Symptom duration</b>              |                                 |                                 |                                 |                                 |                                |                      |
| No persistent symptoms               | 0 (0%)                          | 0 (0%)                          | 0 (0%)                          | 0 (0%)                          | 0 (0%)                         |                      |
| <1 month                             | 0 (0%)                          | 0 (0%)                          | 0 (0%)                          | 0 (0%)                          | 0 (0%)                         |                      |
| 1-3 months                           | 0 (0%)                          | 0 (0%)                          | 0 (0%)                          | 0 (0%)                          | 0 (0%)                         |                      |
| 3-6 months                           | 124 (12%)                       | 34 (12%)                        | 60 (11%)                        | 15 (14%)                        | 15 (17%)                       |                      |
| >6 months                            | 126 (12%)                       | 30 (10%)                        | 64 (11%)                        | 17 (15%)                        | 15 (17%)                       |                      |
| Still persistent                     | 800 (76%)                       | 222 (78%)                       | 439 (78%)                       | 79 (71%)                        | 60 (67%)                       |                      |
| <b>Any symptom (%)</b>               | 1,046 (100%)                    | 286 (100%)                      | 559 (99%)                       | 111 (100%)                      | 90 (100%)                      | 0.6                  |
| <b>Loss of smell/taste (%)</b>       | 191 (18%)                       | 17 (5.9%)                       | 21 (3.7%)                       | 111 (100%)                      | 42 (47%)                       | <0.001               |
| <b>Brain fog (%)</b>                 | 92 (8.8%)                       | 4 (1.4%)                        | 26 (4.6%)                       | 5 (4.5%)                        | 57 (63%)                       | <0.001               |
| <b>Gastrointestinal symptoms (%)</b> | 41 (3.9%)                       | 5 (1.7%)                        | 12 (2.1%)                       | 1 (0.9%)                        | 23 (26%)                       | <0.001               |
| <b>Chest pain (%)</b>                | 115 (11%)                       | 16 (5.6%)                       | 54 (9.6%)                       | 7 (6.3%)                        | 38 (42%)                       | <0.001               |
| <b>Breathlessness (%)</b>            | 160 (15%)                       | 16 (5.6%)                       | 85 (15%)                        | 10 (9.0%)                       | 49 (54%)                       | <0.001               |
| <b>Dyspnea (%)</b>                   | 230 (22%)                       | 20 (7.0%)                       | 143 (25%)                       | 20 (18%)                        | 47 (52%)                       | <0.001               |

SUPPLEMENTARY MATERIAL - Nationally representative prevalence and determinants of post-acute sequelae of SARS-CoV-2 infection (Long COVID) amongst adults in Mexico during 2022

| Overall Sample                     |                                    |                                    |                                    |                                    |                                   |                      |
|------------------------------------|------------------------------------|------------------------------------|------------------------------------|------------------------------------|-----------------------------------|----------------------|
| Characteristic                     | Overall, N =<br>1,050 <sup>1</sup> | Cluster 1, N =<br>286 <sup>1</sup> | Cluster 2, N =<br>563 <sup>1</sup> | Cluster 3, N<br>= 111 <sup>1</sup> | Cluster 4, N<br>= 90 <sup>1</sup> | p-value <sup>2</sup> |
| <b>Musculoskeletal pain (%)</b>    | 296 (28%)                          | 181 (63%)                          | 35 (6.2%)                          | 13 (12%)                           | 67 (74%)                          | <0.001               |
| <b>Dizziness (%)</b>               | 83 (7.9%)                          | 6 (2.1%)                           | 37 (6.6%)                          | 6 (5.4%)                           | 34 (38%)                          | <0.001               |
| <b>Headache (%)</b>                | 242 (23%)                          | 44 (15%)                           | 117 (21%)                          | 14 (13%)                           | 67 (74%)                          | <0.001               |
| <b>Weight loss (%)</b>             | 54 (5.1%)                          | 5 (1.7%)                           | 14 (2.5%)                          | 8 (7.2%)                           | 27 (30%)                          | <0.001               |
| <b>Loss of appetite (%)</b>        | 41 (3.9%)                          | 7 (2.4%)                           | 16 (2.8%)                          | 4 (3.6%)                           | 14 (16%)                          | <0.001               |
| <b>Kidney problems (%)</b>         | 25 (2.4%)                          | 2 (0.7%)                           | 10 (1.8%)                          | 1 (0.9%)                           | 12 (13%)                          | <0.001               |
| <b>Sleep disturbances (%)</b>      | 119 (11%)                          | 20 (7.0%)                          | 47 (8.3%)                          | 5 (4.5%)                           | 47 (52%)                          | <0.001               |
| <b>Fever (%)</b>                   | 62 (5.9%)                          | 19 (6.6%)                          | 17 (3.0%)                          | 3 (2.7%)                           | 23 (26%)                          | <0.001               |
| <b>Depression (%)</b>              | 70 (6.7%)                          | 3 (1.0%)                           | 35 (6.2%)                          | 1 (0.9%)                           | 31 (34%)                          | <0.001               |
| <b>Anxiety (%)</b>                 | 111 (11%)                          | 7 (2.4%)                           | 56 (9.9%)                          | 0 (0%)                             | 48 (53%)                          | <0.001               |
| <b>Fatigue (%)</b>                 | 467 (44%)                          | 93 (33%)                           | 274 (49%)                          | 21 (19%)                           | 79 (88%)                          | <0.001               |
| <b>Chronic cough (%)</b>           | 241 (23%)                          | 139 (49%)                          | 56 (9.9%)                          | 7 (6.3%)                           | 39 (43%)                          | <0.001               |
| <b>Post-exertional malaise (%)</b> | 199 (19%)                          | 39 (14%)                           | 86 (15%)                           | 18 (16%)                           | 56 (62%)                          | <0.001               |
| <b>PASC score</b>                  | 3.0 (1.0, 8.0)                     | 4.0 (0.0, 5.0)                     | 1.0 (0.0, 5.0)                     | 8.0 (8.0, 10.0)                    | 13.0 (10.0, 19.0)                 | <0.001               |
| <b>DISLI quartile</b>              |                                    |                                    |                                    |                                    |                                   | 0.007                |
| Q1                                 | 277 (26%)                          | 64 (22%)                           | 157 (28%)                          | 32 (29%)                           | 24 (27%)                          |                      |
| Q2                                 | 326 (31%)                          | 77 (27%)                           | 171 (30%)                          | 48 (43%)                           | 30 (33%)                          |                      |
| Q3                                 | 244 (23%)                          | 84 (29%)                           | 120 (21%)                          | 20 (18%)                           | 20 (22%)                          |                      |
| Q4                                 | 203 (19%)                          | 61 (21%)                           | 115 (20%)                          | 11 (9.9%)                          | 16 (18%)                          |                      |

SUPPLEMENTARY MATERIAL - Nationally representative prevalence and determinants of post-acute sequelae of SARS-CoV-2 infection (Long COVID) amongst adults in Mexico during 2022

| Overall Sample                 |                                 |                                 |                                 |                                 |                                |                      |
|--------------------------------|---------------------------------|---------------------------------|---------------------------------|---------------------------------|--------------------------------|----------------------|
| Characteristic                 | Overall, N = 1,050 <sup>1</sup> | Cluster 1, N = 286 <sup>1</sup> | Cluster 2, N = 563 <sup>1</sup> | Cluster 3, N = 111 <sup>1</sup> | Cluster 4, N = 90 <sup>1</sup> | p-value <sup>2</sup> |
| <b>CES-D score</b>             | 6.0 (4.0, 9.0)                  | 6.0 (4.0, 9.0)                  | 6.0 (4.0, 9.0)                  | 5.0 (3.0, 9.0)                  | 8.0 (6.0, 10.0)                | 0.005                |
| <b>Diabetes (%)</b>            | 100 (17%)                       | 35 (24%)                        | 50 (16%)                        | 8 (14%)                         | 7 (14%)                        | 0.11                 |
| <b>Hypertension (%)</b>        | 148 (26%)                       | 48 (33%)                        | 75 (24%)                        | 12 (20%)                        | 13 (25%)                       | 0.14                 |
| <b>Daily smoking (%)</b>       | 38 (6.6%)                       | 8 (5.5%)                        | 18 (5.7%)                       | 10 (17%)                        | 2 (3.9%)                       | 0.024                |
| <b>Vaccine type</b>            |                                 |                                 |                                 |                                 |                                |                      |
| Unvaccinated                   | 63 (6.0%)                       | 21 (7.3%)                       | 28 (5.0%)                       | 5 (4.5%)                        | 9 (10%)                        |                      |
| mRNA                           | 316 (30%)                       | 81 (28%)                        | 173 (31%)                       | 35 (32%)                        | 27 (30%)                       |                      |
| Adenovirus vector              | 554 (53%)                       | 151 (53%)                       | 299 (53%)                       | 58 (52%)                        | 46 (51%)                       |                      |
| Inactivated virus              | 94 (9.0%)                       | 29 (10%)                        | 47 (8.3%)                       | 12 (11%)                        | 6 (6.7%)                       |                      |
| Other                          | 23 (2.2%)                       | 4 (1.4%)                        | 16 (2.8%)                       | 1 (0.9%)                        | 2 (2.2%)                       |                      |
| <b>Incapacitating symptoms</b> | 147 (14%)                       | 38 (13%)                        | 78 (14%)                        | 16 (14%)                        | 15 (17%)                       | 0.9                  |

<sup>1</sup>n (%); Median (IQR)

<sup>2</sup>Pearson's Chi-squared test; Wilcoxon rank sum test; Fisher's exact test

**SUPPLEMENTARY FIGURES**

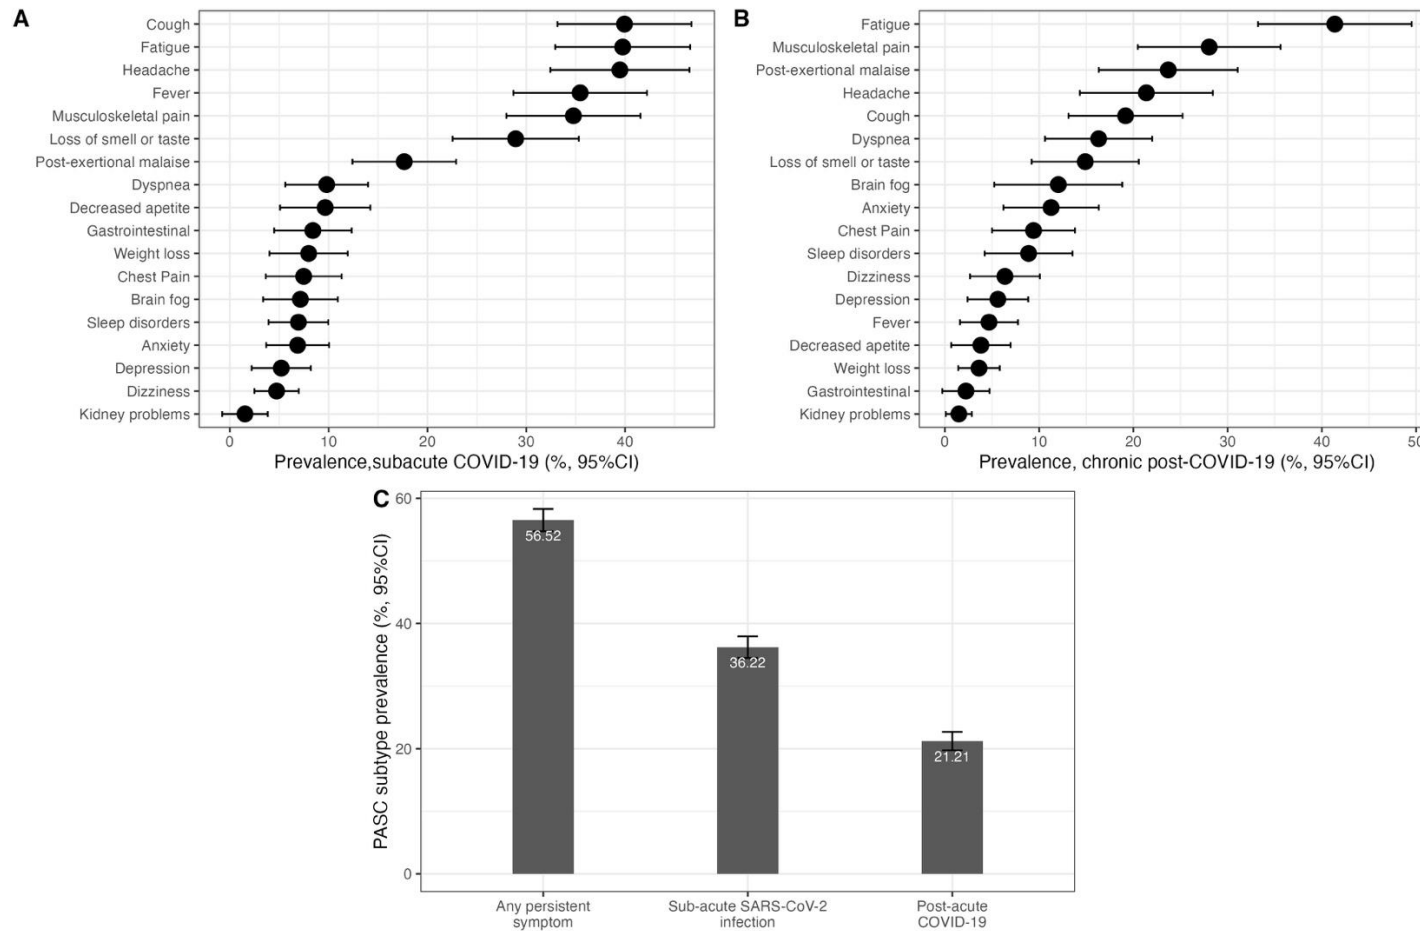

**Supplementary Figure 1.** Prevalence of persistent COVID-19 symptoms amongst SARS-CoV-2 N-protein seropositive adults ≥20 years in ENSANUT 2022 stratified comparing cases with subacute or ongoing symptomatic COVID-19 (A) and chronic post-COVID-19 syndrome according to the NICE definition (B). The figure also shows the prevalence any persistent COVID-19 symptom, subacute SARS-CoV-2 infection and chronic post-COVID-19 sequelae according to the NICE definition (PASC-NICE, C).

SUPPLEMENTARY MATERIAL - Nationally representative prevalence and determinants of post-acute sequelae of SARS-CoV-2 infection (Long COVID) amongst adults in Mexico during 2022

A

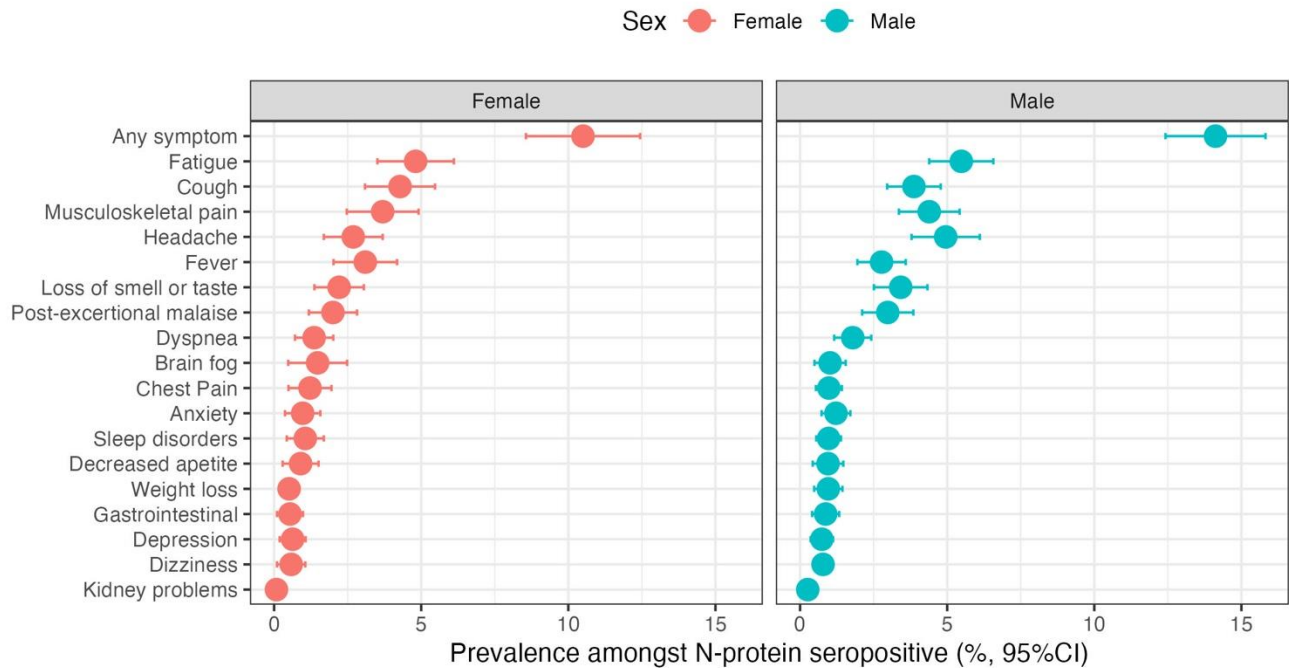

B

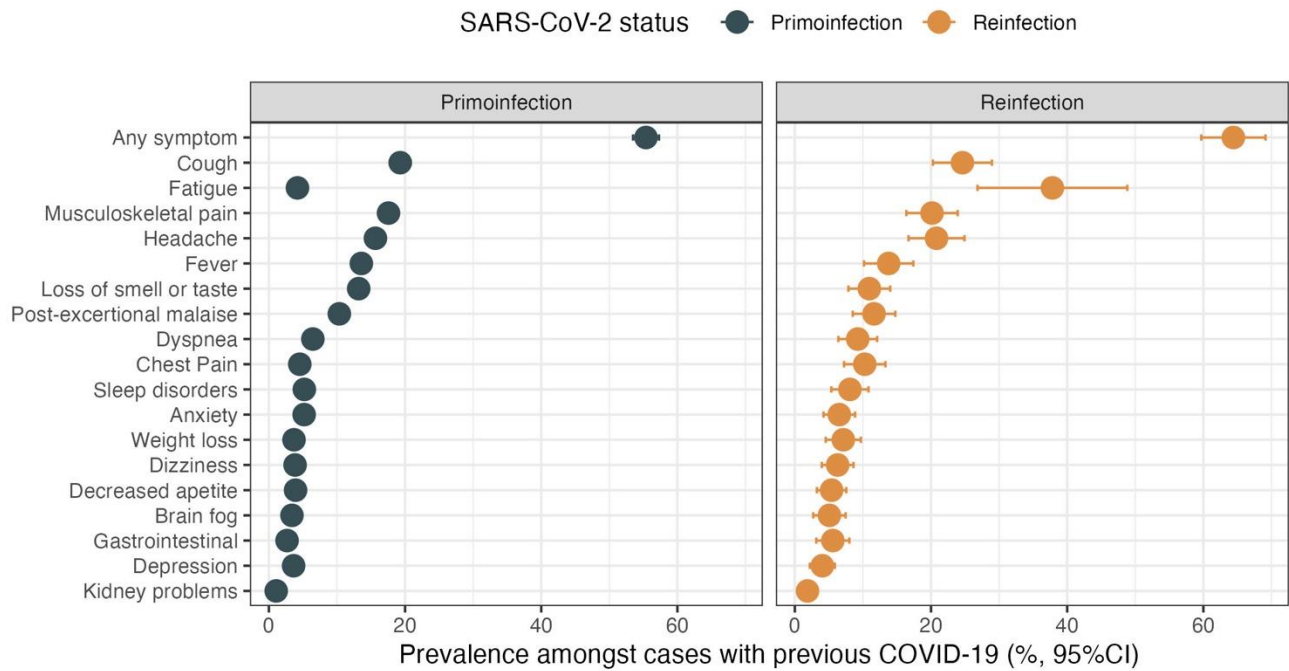

**Supplementary Figure 2.** Prevalence of persistent COVID-19 symptoms amongst SARS-CoV-2 N-protein seropositive adults  $\geq 20$  years in ENSANUT 2022 stratified by sex (A) and by SARS-CoV-2 infection status (primoinfection vs. at least one reinfection, B).

SUPPLEMENTARY MATERIAL - Nationally representative prevalence and determinants of post-acute sequelae of SARS-CoV-2 infection (Long COVID) amongst adults in Mexico during 2022

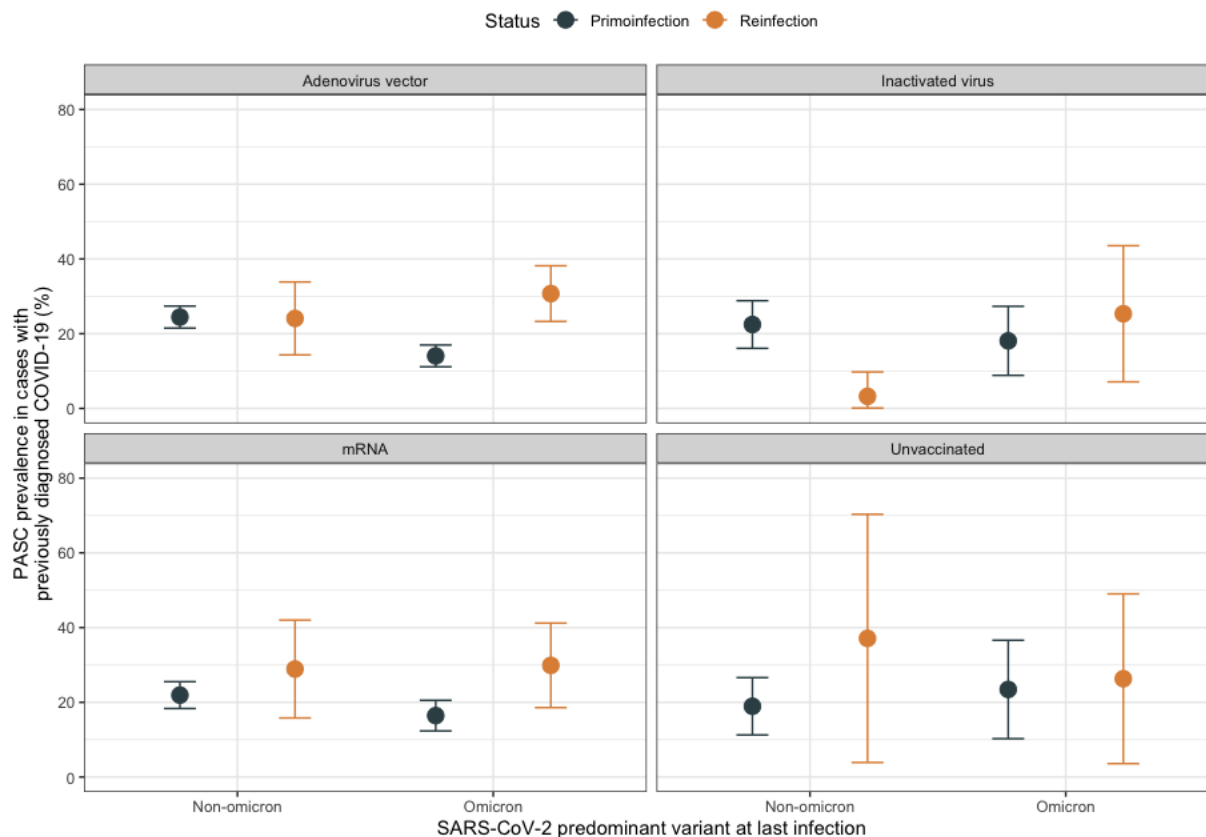

**Supplementary Figure 3.** Prevalence of post-acute SARS-CoV-2 sequelae using the NICE definition (PASC-NICE) in cases with and without primoinfection comparing periods of Omicron and non-Omicron variant predominance stratified by specific vaccine product.

*SUPPLEMENTARY MATERIAL - Nationally representative prevalence and determinants of post-acute sequelae of SARS-CoV-2 infection (Long COVID) amongst adults in Mexico during 2022*

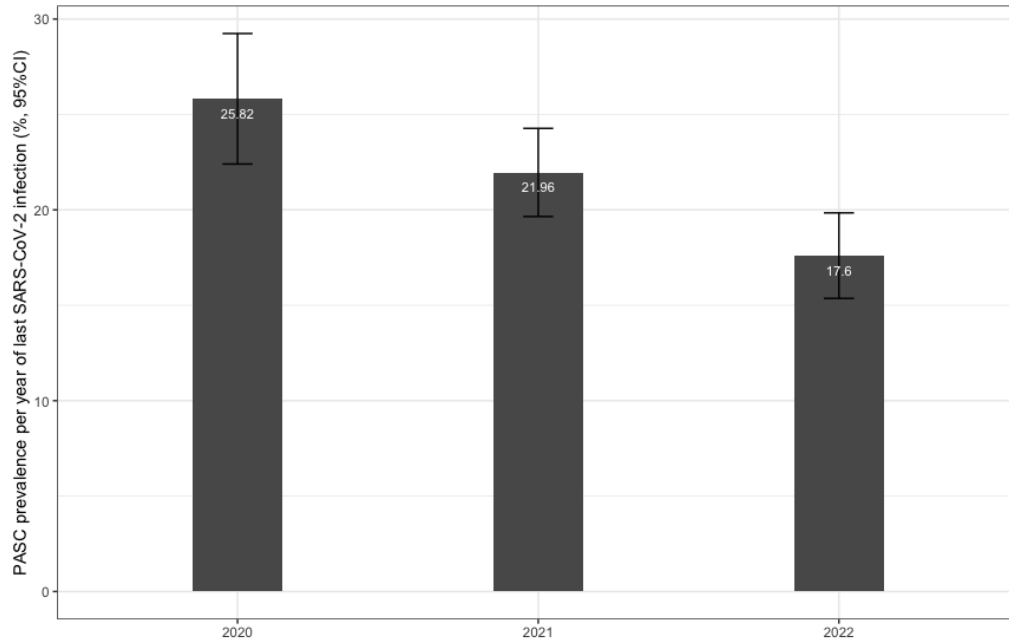

**Supplementary Figure 4.** Comparison of the prevalence of post-acute sequelae after SARS-CoV-2 infection (PASC) for cases with infections detected in 2020, 2021 and 2022.



SUPPLEMENTARY MATERIAL - Nationally representative prevalence and determinants of post-acute sequelae of SARS-CoV-2 infection (Long COVID) amongst adults in Mexico during 2022

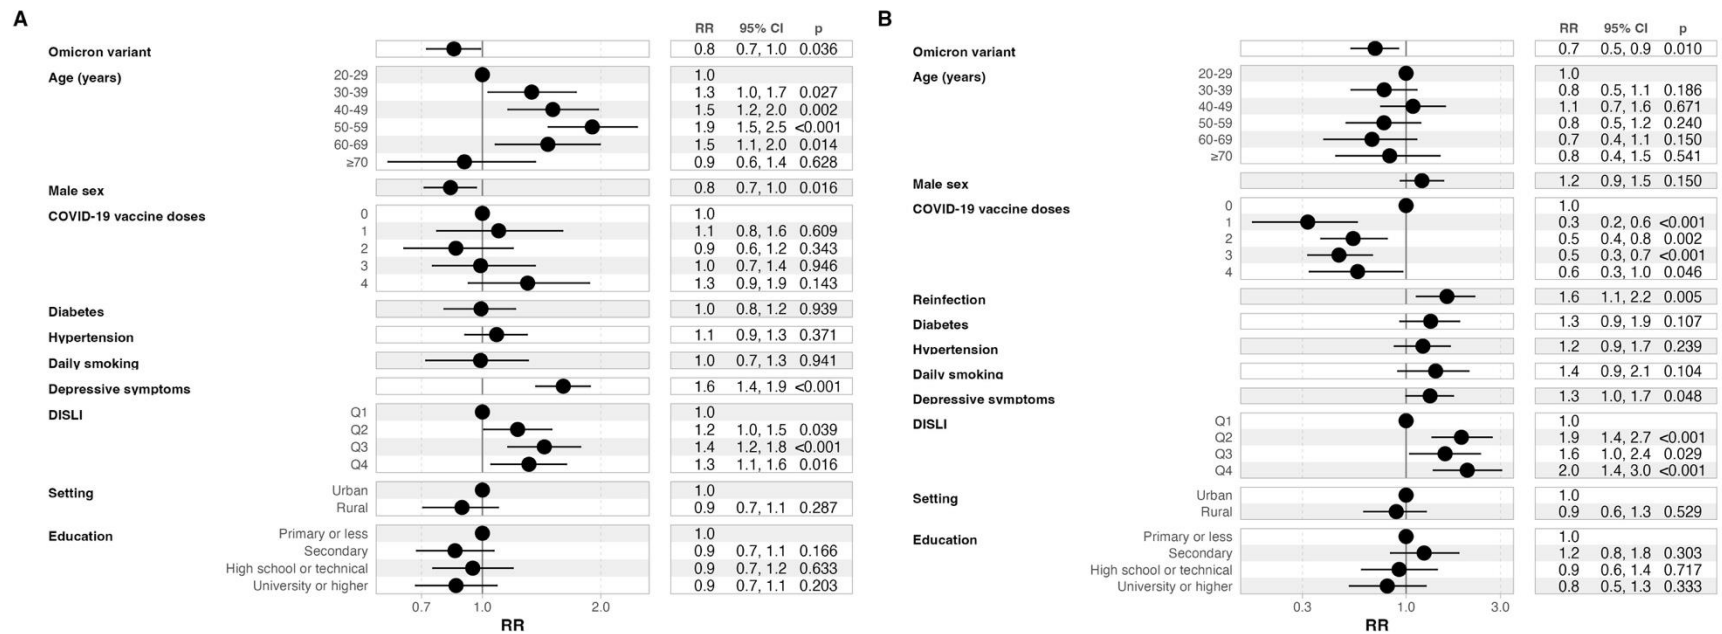

**Supplementary Figure 6.** Fixed effects log-binomial regression model with robust standard errors adjusted by survey weights for prediction of post-acute sequelae of SARS-CoV-2 symptoms (PASC) using the NICE definition (**A**) and identified by a PASC score  $\geq 12$  (**B**) amongst Mexican adults enrolled in ENSANUT 2022, disaggregating vaccinations by the number of vaccine doses compared to unvaccinated individuals. All results are presented as Relative Risks (RR) with their corresponding 95% confidence intervals.

**Abbreviations:** DISLI, Density-independent social lag-index; Depressive symptoms: Moderate to severe depressive symptoms identified by the Center for Epidemiologic Studies Depression Scale

*SUPPLEMENTARY MATERIAL - Nationally representative prevalence and determinants of post-acute sequelae of SARS-CoV-2 infection (Long COVID) amongst adults in Mexico during 2022*

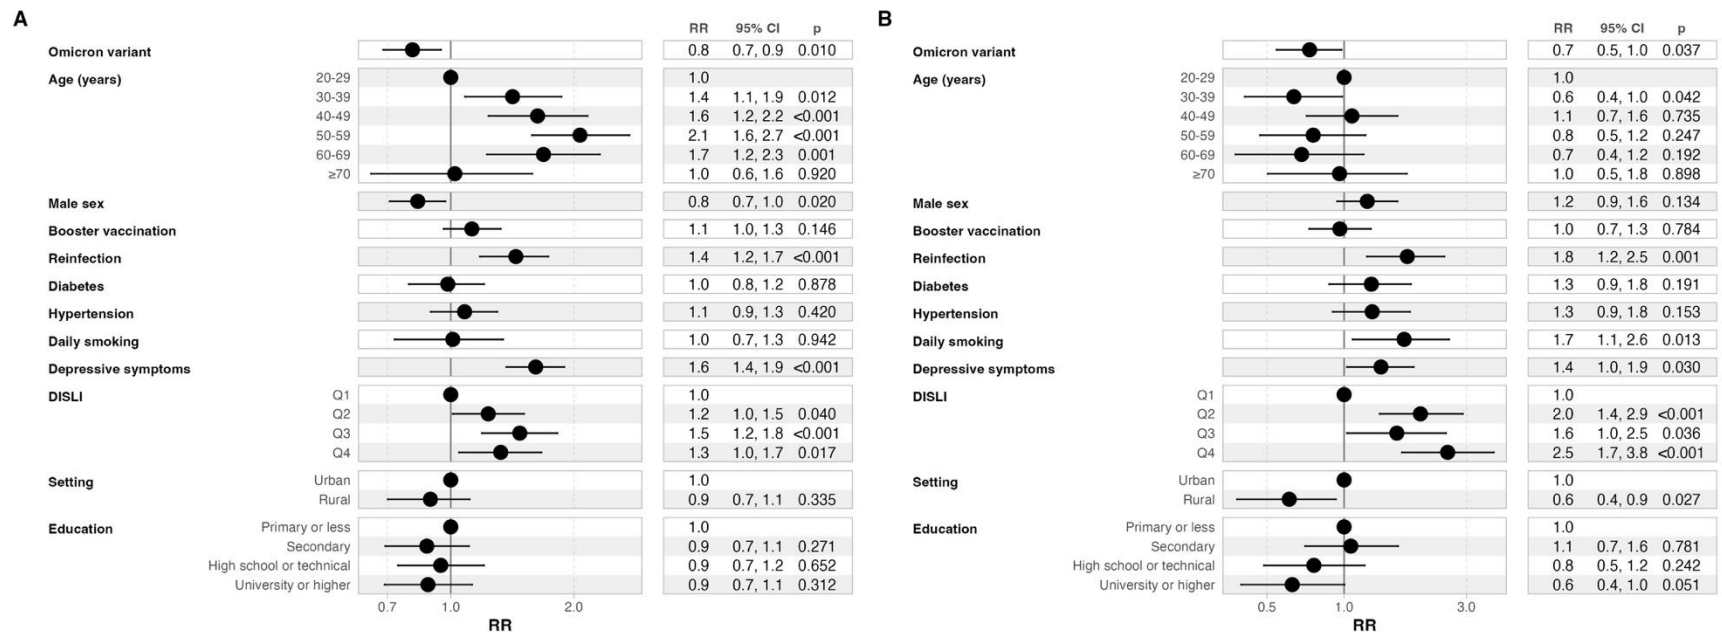

**Supplementary Figure 7.** Fixed effects log-binomial regression model adjusted by survey weights for prediction of post-acute sequelae of SARS-CoV-2 symptoms (PASC) using the NICE definition (**A**) and identified by a PASC score  $\geq 12$  (**B**) amongst Mexican adults enrolled in ENSANUT 2022 who received full primary vaccination schedule to assess the influence of vaccine boosters. All results are presented as Relative Risks (RR) with their corresponding 95% confidence intervals.

**Abbreviations:** DISLI, Density-independent social lag-index; Depressive symptoms: Moderate to severe depressive symptoms identified by the Center for Epidemiologic Studies Depression Scale

SUPPLEMENTARY MATERIAL - Nationally representative prevalence and determinants of post-acute sequelae of SARS-CoV-2 infection (Long COVID) amongst adults in Mexico during 2022

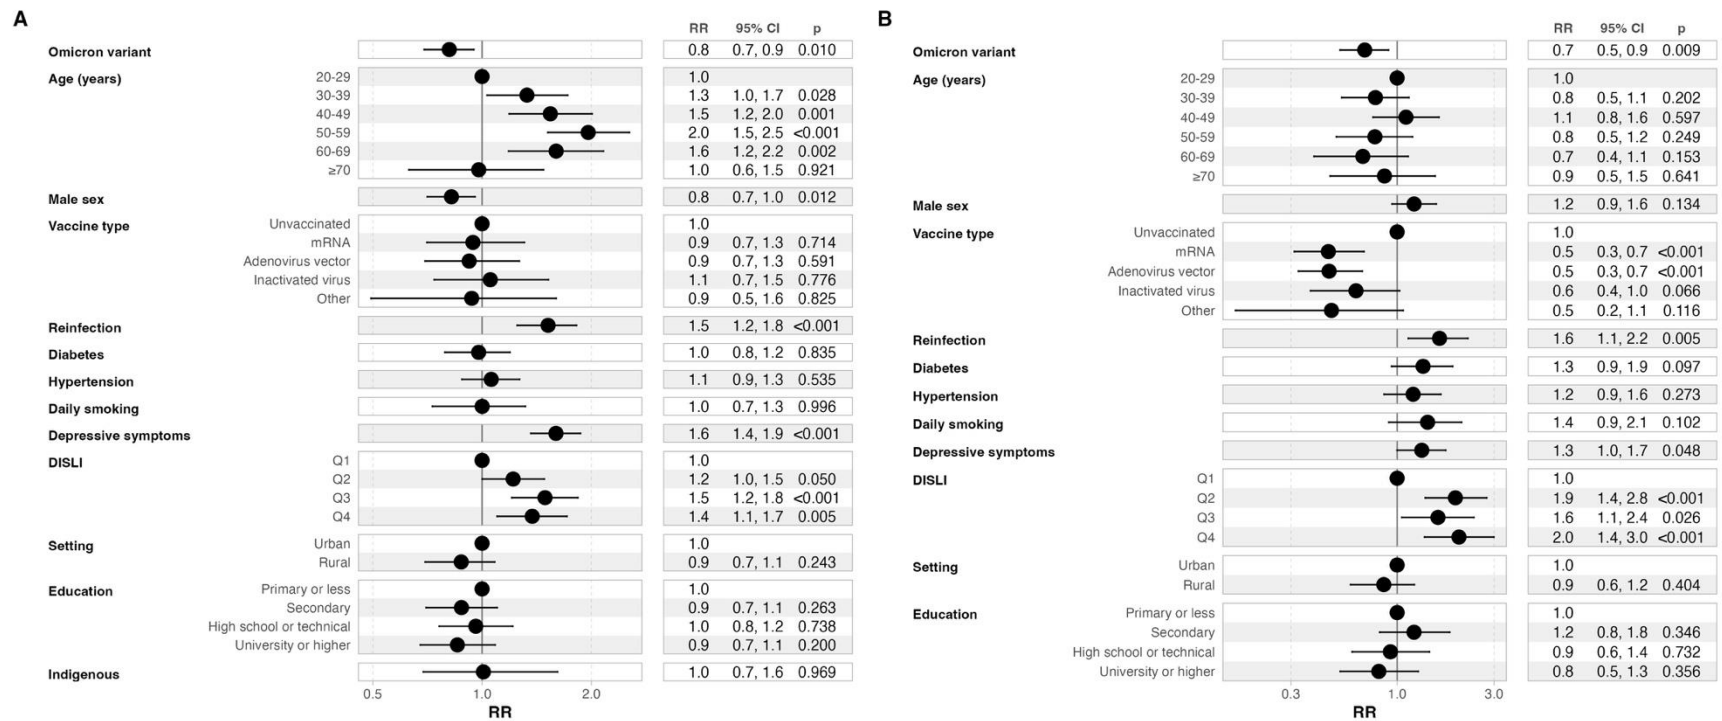

**Supplementary Figure 8.** Fixed effects log-binomial regression model adjusted by survey weights for prediction of post-acute sequelae of SARS-CoV-2 symptoms (PASC) using the NICE definition (**A**) and identified by a PASC score  $\geq 12$  (**B**) amongst Mexican adults enrolled in ENSANUT 2022, disaggregating vaccinations by vaccine type of primary vaccination schedule compared to unvaccinated individuals. All results are presented as Relative Risks (RR) with their corresponding 95% confidence intervals.

**Abbreviations:** DISLI, Density-independent social lag-index; Depressive symptoms: Moderate to severe depressive symptoms identified by the Center for Epidemiologic Studies Depression Scale

SUPPLEMENTARY MATERIAL - Nationally representative prevalence and determinants of post-acute sequelae of SARS-CoV-2 infection (Long COVID) amongst adults in Mexico during 2022

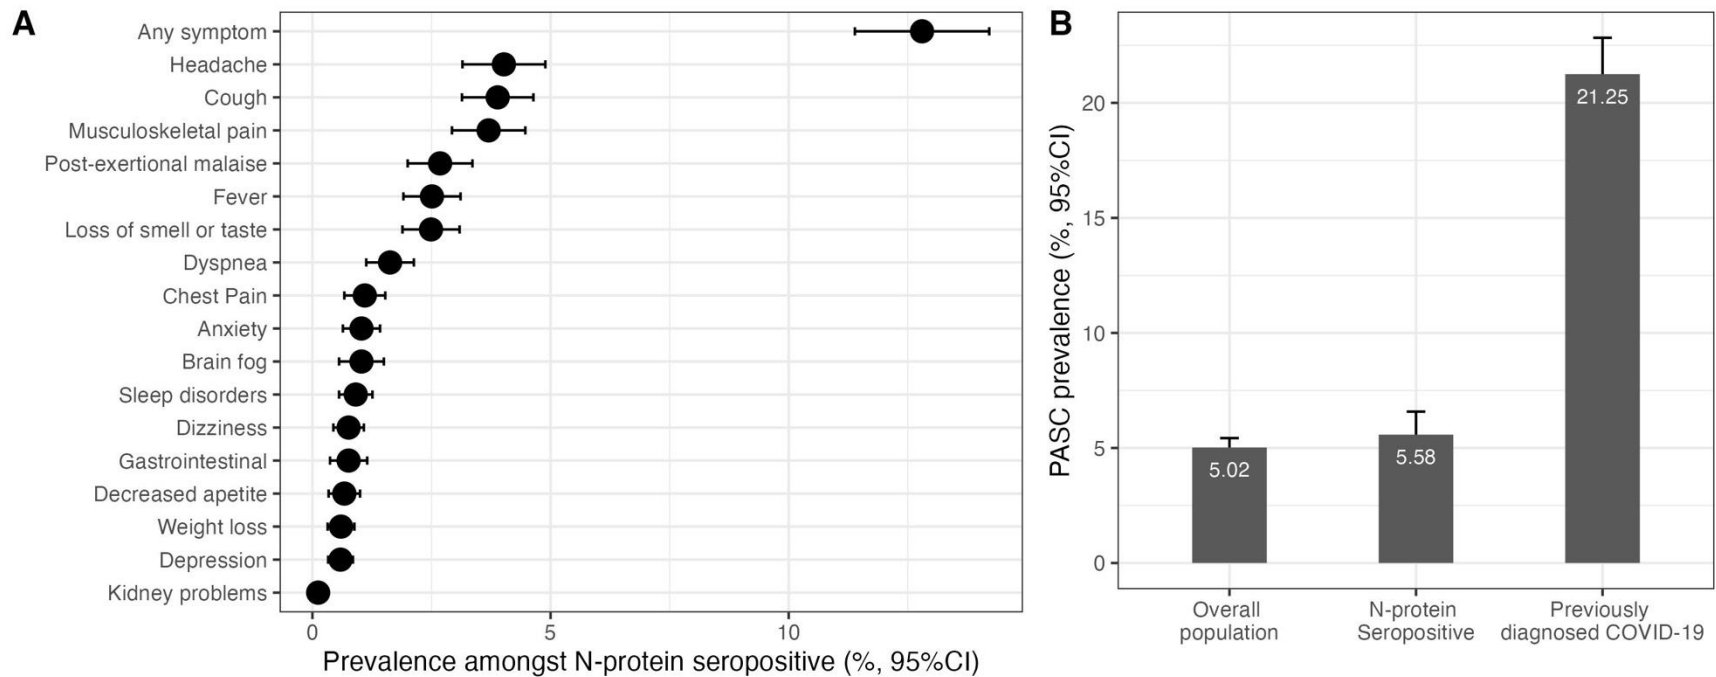

**Supplementary Figure 9.** Prevalence of persistent COVID-19 symptoms amongst SARS-CoV-2 N-protein seropositive adults  $\geq 20$  years in ENSANUT 2022 who did not receive the CoronaVac vaccine (A) and prevalence of post-acute sequelae of SARS-CoV-2 symptoms (PASC) as identified by the NICE definition in the overall population who did not receive the CoronaVac vaccine, in SARS-CoV-2 N-protein seropositive adults who did not receive the CoronaVac vaccine and in individuals with COVID-19 previously diagnosed by a physician who did not receive the CoronaVac vaccine in the ENSANUT 2022 sample (B).

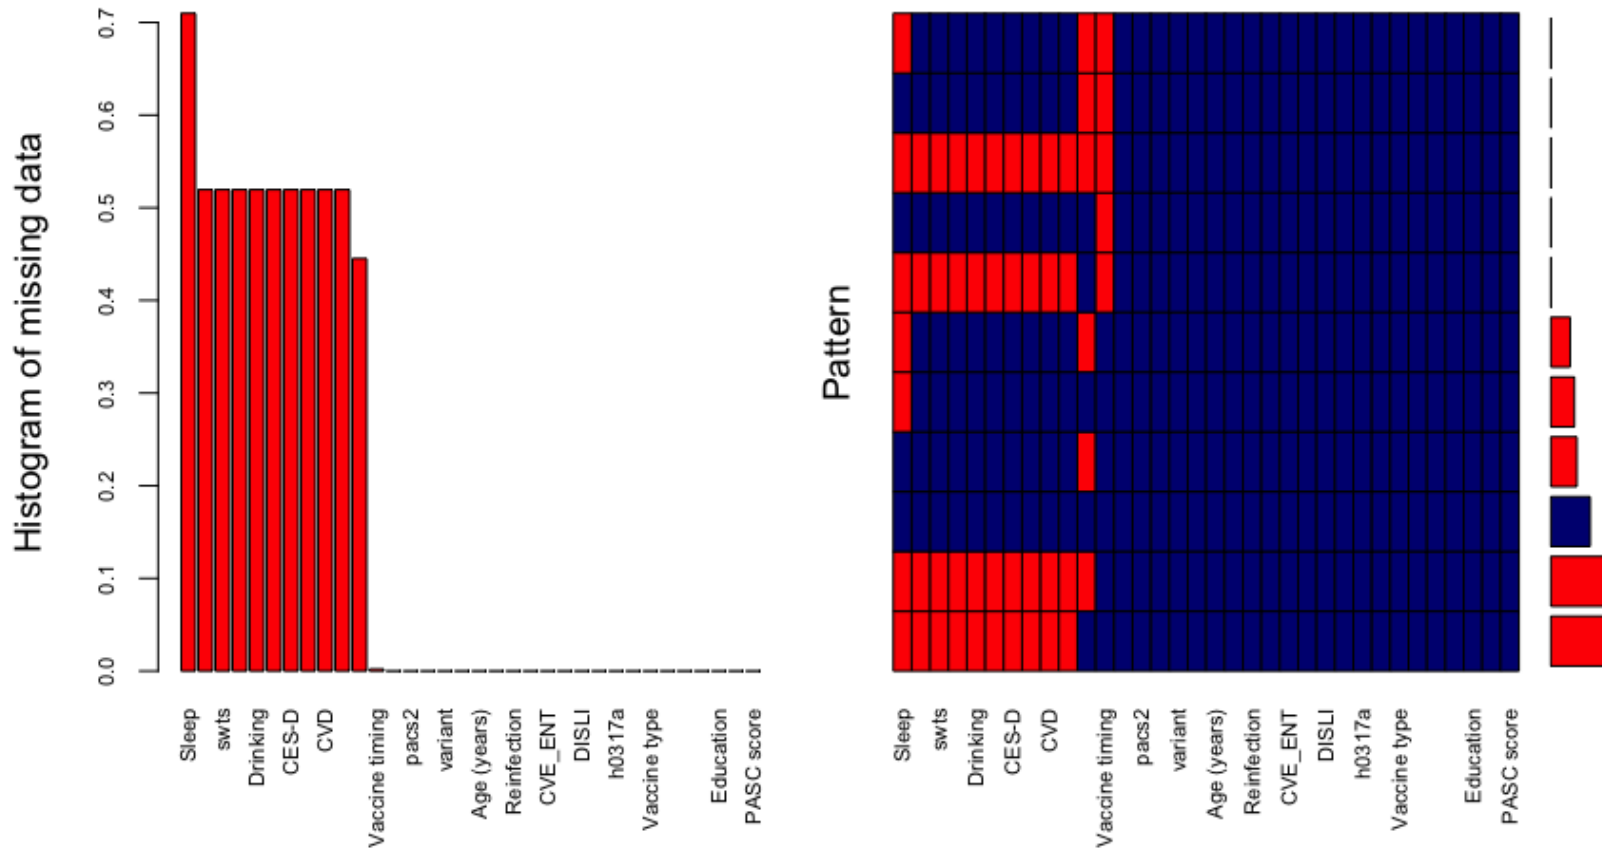

**Supplementary Figure 10.** Missing data patterns in participants with previous diagnosis of COVID-19 by a doctor, analyzed with the *VIM* R package. No data was missing regarding persistent symptoms. Most missing data was related to comorbidities. Because no apparent patterns were identified, complete-case analyses were conducted under the assumption of data missing completely at random.
